# Supplementary material for: A Quantitative High-Resolution Genetic Profile Rapidly Identifies Sequence Determinants of Hepatitis C Viral Fitness and Drug Sensitivity
Source: PLoS Pathog. 2014 Apr 10;10(4):e1004064. doi: 10.1371/journal.ppat.1004064 (PMC3983061; doi:10.1371/journal.ppat.1004064)
Supplement: Table S5 — Table of fold change in relative fitness scores for each variant that is used to plot figure 4A . (XLSX) [file ppat.1004064.s010.xlsx]

## Sheet: Sheet1
Fold of W (Log10 base)			18	19	20	21	22	23	24	25	26	27	28	29	30	31	32	33	34	35	36	37	38	39	40	41	42	43	44	45	46	47	48	49	50	51	52	53	54	55	56	57	58	59	60	61	62	63	64
			D	F	K	N	W	L	T	S	K	L	F	P	K	L	P	G	L	P	F	I	S	C	Q	K	G	Y	K	G	V	W	A	G	T	G	I	M	T	T	R	C	P	C	G	A	N	I	S
		K	NA	NA	0	NA	NA	NA	0.138628	NA	0	NA	NA	NA	0	NA	NA	NA	NA	NA	NA	NA	NA	NA	NA	0	NA	NA	0	NA	0.23527	NA	-0.289667	NA	-0.10925	NA	NA	NA	-2	NA	NA	NA	-2	NA	NA	NA	NA	NA	NA
		R	NA	NA	0.228365	NA	NA	NA	0.164582	-2	-0.0681604	NA	NA	NA	-0.17357	NA	NA	NA	NA	NA	NA	NA	NA	NA	NA	-0.0949063	NA	NA	-0.0825281	NA	-0.018389	NA	-0.34985	NA	-0.13198	NA	NA	NA	-0.190494	NA	0	NA	-2	NA	NA	NA	-2	NA	NA
		H	NA	NA	NA	-0.473786	NA	NA	-2	-2	NA	NA	NA	NA	-0.29097	NA	NA	NA	NA	NA	NA	NA	0.600991	NA	NA	-0.10057	NA	NA	0.0826172	NA	0.143268	NA	-0.343082	NA	-0.202902	NA	NA	NA	-0.152024	NA	-1.23915	NA	-0.259188	NA	NA	NA	-2	NA	NA
		D	0	NA	NA	-2	NA	NA	NA	NA	NA	NA	NA	NA	NA	NA	NA	NA	NA	NA	NA	NA	NA	NA	NA	NA	NA	NA	NA	NA	0.163593	NA	-0.679508	NA	-0.466047	NA	NA	NA	NA	NA	NA	NA	0.789102	NA	NA	NA	0.0318834	NA	NA
		E	NA	NA	NA	0.261603	NA	NA	NA	NA	NA	NA	NA	-0.0697626	-2	NA	NA	NA	NA	NA	NA	NA	NA	NA	NA	-2	NA	NA	NA	NA	0.0816188	NA	-0.350317	NA	0.0648045	NA	NA	NA	0.161461	NA	NA	NA	NA	NA	NA	NA	0.423234	NA	NA
		N	NA	NA	NA	0	NA	NA	NA	NA	NA	NA	NA	NA	-0.529805	NA	NA	NA	NA	NA	NA	NA	0.401128	NA	NA	-0.1454	NA	NA	-0.152871	NA	-0.0796501	NA	-0.244971	-0.500619	-0.308166	NA	NA	NA	-0.317878	NA	-2	NA	0.239038	NA	NA	NA	0	NA	0.00655036
		Q	NA	NA	NA	-0.0899305	NA	NA	0.235879	NA	NA	NA	NA	NA	-2	NA	NA	NA	NA	NA	NA	NA	0.0555423	NA	0	-0.203107	NA	NA	-0.0182059	NA	-0.0337016	NA	-0.217944	NA	0.419223	NA	NA	NA	-0.147209	NA	NA	NA	-1.37239	NA	NA	NA	-0.297174	NA	-0.0306152
		S	NA	NA	0.0999404	-0.552072	NA	NA	0.738855	0	NA	NA	0.862032	NA	-1.82407	NA	NA	NA	NA	-0.0708102	NA	NA	0	NA	NA	-0.239638	NA	NA	-0.0025318	NA	0.136075	NA	-0.17793	NA	-0.0801117	NA	-2	NA	-0.168392	0.215394	-2	NA	-0.315061	NA	NA	0.552233	-0.732452	NA	0
		T	NA	NA	0.502839	-0.51418	NA	-2	0	-0.0481261	NA	NA	0.877076	NA	-2	NA	NA	NA	NA	NA	NA	NA	0.167407	NA	NA	-0.109685	NA	NA	-0.0217548	NA	0.00831806	NA	-0.267966	NA	0	NA	-0.164391	NA	0	0	-2	NA	-0.509285	NA	NA	NA	-0.121667	NA	NA
		P	NA	NA	NA	NA	NA	NA	NA	NA	NA	NA	NA	0	NA	NA	0	NA	NA	0	NA	NA	NA	NA	NA	-0.116004	NA	NA	NA	NA	0.0200435	NA	NA	NA	NA	NA	-2	NA	NA	NA	NA	NA	0	NA	NA	NA	-0.0734412	NA	NA
		G	NA	NA	-0.138235	-0.194074	NA	NA	0.767497	0.208506	NA	NA	0.935879	NA	0.323806	NA	NA	0	NA	NA	NA	NA	0.496547	NA	NA	-0.168475	0	NA	-0.107222	0	0.121075	NA	-0.0979545	0	-0.110153	0	NA	NA	-0.118202	0.0483618	NA	NA	-0.900471	NA	0	-0.178878	-0.921875	NA	-0.576232
		C	NA	NA	0.157555	-0.754052	NA	0.0510223	0.640946	-0.591895	-0.754936	-0.28346	0.803414	NA	-1.73892	NA	NA	NA	-0.0846138	-0.128273	NA	NA	0.0638008	0	NA	NA	NA	NA	0.0434244	NA	-0.0313348	NA	-0.154818	NA	-0.167869	NA	-0.374159	-0.0454397	-0.0526184	NA	-2	0	-2	0	NA	NA	-2	NA	-2
		A	NA	NA	-0.0136341	-0.594117	0.444921	0.135148	0.563151	-0.183774	-0.290585	-0.270122	0.839409	NA	-2	NA	NA	NA	-0.0495722	-0.412109	NA	-2	0.788149	NA	NA	-0.187058	NA	NA	-0.0279973	NA	0.0238871	NA	0	NA	0.0352154	NA	NA	NA	-0.12936	-0.198411	-2	NA	-0.682687	NA	NA	0	-0.855391	NA	-0.331421
		V	NA	NA	0.480127	-0.741504	NA	0.0666085	-0.587201	-0.745263	-0.358069	-0.000634482	0.480186	NA	-2	0.833924	NA	NA	-0.0908665	NA	-0.0924808	0.0101625	-0.090416	NA	NA	-0.222554	NA	NA	-0.000522299	NA	0	NA	-0.173031	NA	-0.0711563	NA	-0.0687385	-0.445128	0.0129187	NA	-2	NA	NA	NA	NA	NA	0.339282	0.0239411	NA
		I	NA	NA	0.605461	-0.937365	NA	0.0937459	-2	-2	-0.00941679	0.0701939	0.445657	NA	-2	0.880035	NA	NA	0.0396521	NA	0.0549762	0	NA	NA	NA	-0.270354	NA	NA	-0.0884169	NA	-0.0170231	NA	-0.291113	NA	-0.074943	NA	0	-2	0.120559	NA	-2	NA	NA	NA	NA	NA	0.221069	0	NA
		L	NA	-0.0146657	0.430394	-1.24949	0.383267	0	-0.781319	NA	0.014485	0	-0.635417	NA	-2	0	NA	0.705262	0	NA	0.179979	0.0624148	NA	NA	NA	-0.00673359	NA	NA	-0.0644792	NA	0.0280846	NA	-0.154588	NA	0.302231	NA	0.312813	NA	0.43765	NA	-2	NA	-0.805917	NA	NA	NA	0.273884	0.0828662	NA
		M	NA	-2	0.398136	-0.83798	0.410051	0.0536286	-0.0248383	-2	0.317073	0.238646	0.542326	NA	-2	0.804004	NA	0.192184	0.215479	-0.197092	0.140925	0.328682	0.144333	NA	NA	-0.307127	NA	NA	-0.0671648	NA	-0.0423317	NA	-0.244734	NA	-0.195506	NA	0.214949	0	0.0424408	NA	-2	NA	-2	NA	NA	NA	-0.391958	-0.243014	NA
		F	NA	0	0.316175	-1.11781	0.106109	0.621031	-0.414584	0.182789	-2	0.220465	0	NA	-2	0.696088	NA	NA	0.147999	-0.133679	0	0.0491225	0.0396831	NA	NA	-2	NA	0.0570876	-0.0394147	NA	0.0781462	NA	-0.159325	NA	-0.224809	NA	0.0208345	NA	-1.02516	NA	-2	NA	-2	NA	NA	NA	-2	NA	NA
		Y	NA	0.42436	0.303257	-2	0.0045968	NA	-0.915089	0.361944	NA	NA	0.547692	NA	0.635399	NA	NA	NA	NA	-0.292567	0.0337321	0.445022	0.552349	NA	NA	-0.178852	NA	0	-0.179804	NA	0.15787	NA	-0.276578	NA	-0.000346432	NA	NA	NA	-0.291674	NA	-1.5286	NA	-2	NA	NA	NA	NA	NA	NA
		W	NA	0.307011	0.553792	-1.15341	0	-2	-0.623978	-2	NA	NA	NA	NA	0.340183	NA	NA	NA	NA	0.116033	0.110774	0.211914	0.340644	NA	NA	-0.284952	NA	NA	-0.216643	NA	0.176897	0	-0.251175	NA	-0.200706	NA	NA	NA	-2	NA	NA	NA	0.0879425	NA	NA	NA	NA	NA	NA
[truncated: 39 more columns]
